# Supplementary material for: Burden and associated pathologies in family caregivers of Alzheimer’s disease patients in Spain
Source: PubMed Central journal article supplement — Pharm Pract (Granada). 2015 Jun 15;13(2):521. doi: 10.18549/pharmpract.2015.02.521 (PMC4482840; doi:10.18549/pharmpract.2015.02.521), 2015-06-15
Supplement: pharmpract-13-521-suppl.pdf [file pharmpract-13-521-suppl.pdf]

## SOCIODEMOGRAPHIC SURVEY

Survey No.\_\_\_\_

-Age:

-Sex:

-Education level (education: primary, secondary, associate's degree, bachelor's degree).

-Marital status: single, married, widowed, separated.

-Relationship to the patient, 2 categories: first degree (parents, children, spouse, siblings), second degree (others).

-Paid work: yes/no

-How long have you been caring for the patient (months).

-Time of disease progression (months, years).

-Total number of people living in the same household.

-Existence of collaboration in caring for the patient by the question, do you have available help to care for the patient, or by an older child, or public or private home care assistance? Permitted responses: (yes/no).

-The patient moves among the homes of several family members (yes/no).

-Medications that the caregiver takes:

Vitamins, tonics...

Medicinal plants: linden, flower tea, valerian...

Psychotropic drugs. Antidepressants, anxiolytics...

Others...

## RELATIONSHIP WITH THE PHARMACY

Survey No.\_\_\_\_

-You tend to always go to the same pharmacy:

Yes  No

-You request a natural remedy (linden, flower tea, valerian...) to improve jitters, anxiety, lack of sleep...:

Yes  No

-You request vitamins, tonics... to improve your general state:

Yes  No

-You are being treated with psychotropic drugs (antidepressants, tranquilizers, anxiolytics...):

Yes  No

-You request information on your general state, anxiety, depression...:

Yes  No

-You just pick up medication without requesting pharmaceutical advice:

Yes  No

-You find that the pharmacist collaborates, listens and advises you:

Yes  No

-In general you are satisfied with treatment received at the pharmacy:

Yes  No
